# Supplementary material for: Genomics, social media and mobile phone data enable mapping of SARS-CoV-2 lineages to inform health policy in Bangladesh
Source: PubMed Central journal article supplement (PMC8478645; doi:10.1038/s41564-021-00955-3), 2021-09-08
Supplement: 41564_2021_955_MOESM1_ESM.pdf [file 41564_2021_955_MOESM1_ESM.pdf]

---

**Supplementary information**

---

**Genomics, social media and mobile phone data enable mapping of SARS-CoV-2 lineages to inform health policy in Bangladesh**

---

In the format provided by the authors and unedited

## Supplementary Material

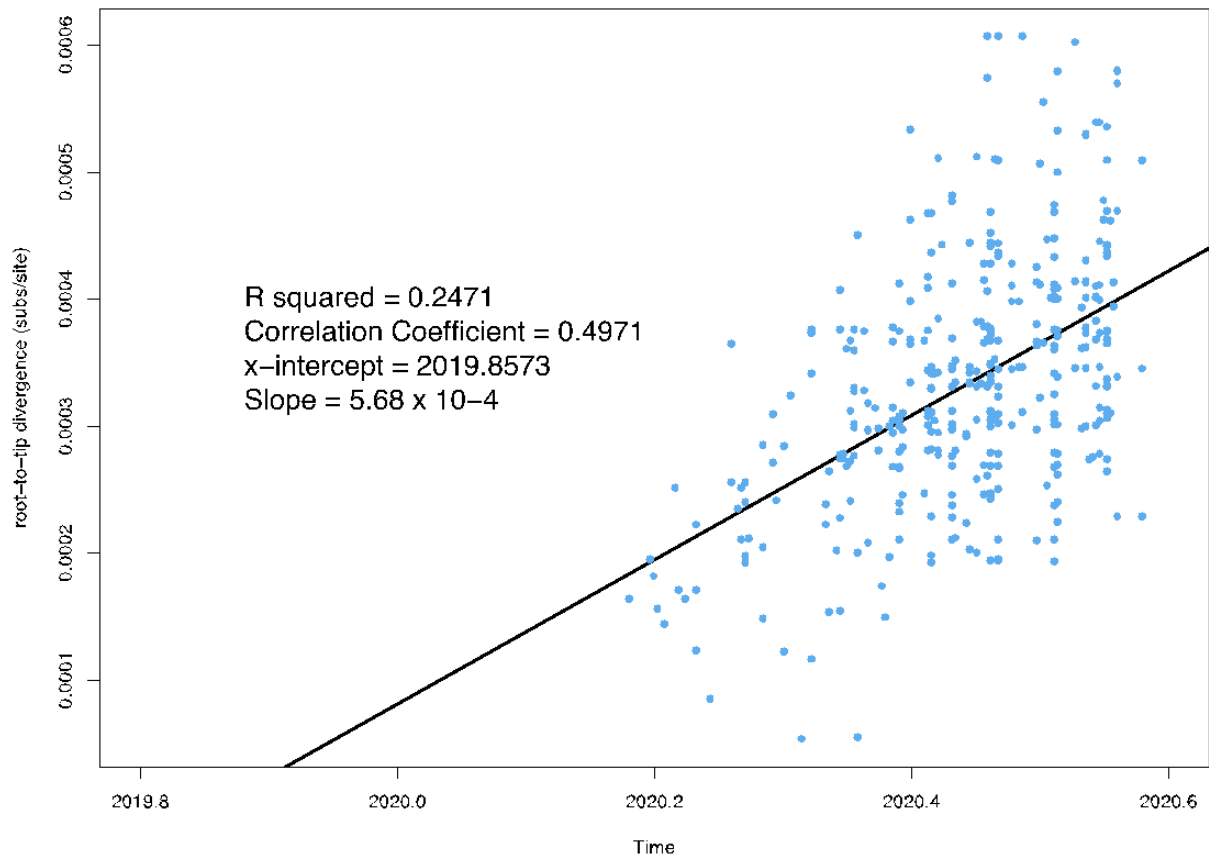

**Supplementary Figure 1:** Root-to-tip divergence plot for 391 sequences sampled in Bangladesh between March and July 2020. Evolutionary tempo was assessed using TempEst v.1.5 and data visualized in R.

**Supplementary Table 1: 67 SARS-CoV-2 samples sequenced (Mar 2020 – Jul 2020) and metadata of sample date, Ct value, District, Sex, Age, Travel history, and Pangolin lineage. NA = Not available**

| Strain name | GISAID Accession | Date         | Ct Value | Division   | District, Area | Sex    | Age (Year) | Travel History               | Lineage    |
|-------------|------------------|--------------|----------|------------|----------------|--------|------------|------------------------------|------------|
| G-85        | EPI_ISL_600570   | May 14, 2020 | 17.6     | Dhaka      | Dhaka          | Male   | 37         | Contact of COVID-19 positive | B.1.1      |
| G-66        | EPI_ISL_600567   | Apr 7, 2020  | 29.5     | Dhaka      | Narayanganj    | NA     | 69         | NA                           | B.1.1      |
| G-40        | EPI_ISL_600564   | Mar 26, 2020 | 20.9     | Dhaka      | Dhaka          | NA     | NA         | NA                           | B.1.2      |
| G-38        | EPI_ISL_600562   | Mar 26, 2020 | 16.3     | Dhaka      | Dhaka          | NA     | 55         | Contact of USA returnee      | B.1.79     |
| G-31        | EPI_ISL_600559   | Mar 26, 2020 | 16.4     | Dhaka      | Dhaka          | Female | NA         | Italy returnee               | B.1.79     |
| G-29        | EPI_ISL_600557   | Mar 23, 2020 | 22.9     | Dhaka      | Dhaka          | NA     | NA         | NA                           | B.1.148    |
| G-27        | EPI_ISL_600554   | Mar 26, 2020 | 19.7     | Rangpur    | Gaibandha      | NA     | NA         | Contact of Sample ID G-23    | B.1        |
| G-24        | EPI_ISL_600552   | Mar 14, 2020 | 28.2     | Dhaka      | Madaripur      | NA     | NA         | Contact of Italy returnee    | B.1.5.12   |
| G-23        | EPI_ISL_600549   | Mar 21, 2020 | 21.5     | Rangpur    | Gaibandha      | Female | 48         | USA Returnee                 | B.1.2      |
| G-220       | EPI_ISL_600546   | May 20, 2020 | 23.1     | Barishal   | Barishal       | NA     | NA         | NA                           | B.1.1      |
| G-219       | EPI_ISL_600543   | May 14, 2020 | 20.2     | Barishal   | Barishal       | NA     | NA         | NA                           | B.1.1      |
| G-218       | EPI_ISL_600541   | May 20, 2020 | 28.1     | Barishal   | Barishal       | NA     | NA         | NA                           | B.1.1      |
| G-217       | EPI_ISL_600538   | May 17, 2020 | 24.6     | Barishal   | Barishal       | NA     | NA         | NA                           | B.1.1      |
| G-216       | EPI_ISL_600535   | May 11, 2020 | 23.0     | Barishal   | Barishal       | NA     | NA         | NA                           | B.1.1      |
| G-203       | EPI_ISL_600533   | May 19, 2020 | 22.0     | Barishal   | Barishal       | NA     | NA         | NA                           | B.1.93     |
| G-201       | EPI_ISL_600530   | May 18, 2020 | 24.4     | Barishal   | Barishal       | NA     | NA         | NA                           | A.9        |
| G-194       | EPI_ISL_600527   | Jul 5, 2020  | 21.6     | Barishal   | Barishal       | NA     | NA         | NA                           | B.1.1      |
| G-193       | EPI_ISL_600524   | Jul 3, 2020  | 16.4     | Chattogram | Cox's Bazar    | NA     | NA         | NA                           | B.1.36     |
| G-192       | EPI_ISL_600522   | Jul 2, 2020  | 21.2     | Chattogram | Cox's Bazar    | NA     | NA         | NA                           | B.1.93     |
| G-187       | EPI_ISL_600519   | Jun 15, 2020 | 26.0     | Chattogram | Cox's Bazar    | NA     | NA         | NA                           | B.1        |
| G-185       | EPI_ISL_600517   | Jun 8, 2020  | 24.8     | Chattogram | Cox's Bazar    | NA     | NA         | NA                           | B.1.1      |
| G-184       | EPI_ISL_600515   | Jun 7, 2020  | 23.1     | Chattogram | Cox's Bazar    | NA     | NA         | NA                           | B.1        |
| G-183       | EPI_ISL_600512   | Jun 12, 2020 | 19.0     | Chattogram | Cox's Bazar    | NA     | NA         | NA                           | B.1.1      |
| G-182       | EPI_ISL_600510   | Jun 16, 2020 | 19.7     | Chattogram | Cox's Bazar    | NA     | NA         | NA                           | B.1.1      |
| G-176       | EPI_ISL_600507   | Jul 4, 2020  | 21.2     | Barishal   | Barishal       | NA     | NA         | NA                           | B.1.1      |
| G-173       | EPI_ISL_600505   | Jul 3, 2020  | 23.2     | Chattogram | Cox's Bazar    | NA     | NA         | NA                           | B.1.1.25.1 |
| G-171       | EPI_ISL_600502   | Jul 1, 2020  | 18.3     | Chattogram | Cox's Bazar    | NA     | NA         | NA                           | B.1.36     |
| G-168       | EPI_ISL_600500   | Jul 4, 2020  | 17.9     | Chattogram | Cox's Bazar    | NA     | NA         | NA                           | B.1.1      |
| G-156       | EPI_ISL_600498   | Jun 18, 2020 | 22.0     | Chattogram | Cox's Bazar    | NA     | NA         | NA                           | B.1.36     |
| G-152       | EPI_ISL_600495   | Jun 17, 2020 | 16.0     | Chattogram | Cox's Bazar    | NA     | NA         | NA                           | B.1.36     |
| G-149       | EPI_ISL_600492   | Jun 8, 2020  | 18.1     | Chattogram | Cox's Bazar    | NA     | NA         | NA                           | B.1.36     |
| G-144       | EPI_ISL_600489   | Jul 1, 2020  | 29.0     | Dhaka      | Dhaka          | NA     | NA         | NA                           | B.1.1      |
| G-142       | EPI_ISL_600487   | Jun 19, 2020 | 28.0     | Dhaka      | Dhaka          | NA     | NA         | NA                           | B.1        |
| G-14        | EPI_ISL_600484   | Apr 14, 2020 | 26.9     | Dhaka      | Narayanganj    | NA     | 58         | NA                           | B.1.1      |
| G-134       | EPI_ISL_600480   | Jun 19, 2020 | 21.8     | Dhaka      | Dhaka          | NA     | NA         | NA                           | B.1.1      |

|        |                |              |      |          |             |        |    |                              |          |
|--------|----------------|--------------|------|----------|-------------|--------|----|------------------------------|----------|
| G-131  | EPI_ISL_600478 | Jul 1, 2020  | 24.5 | Dhaka    | Dhaka       | NA     | NA | NA                           | B.1.1    |
| G-130  | EPI_ISL_600476 | Jul 1, 2020  | 22.0 | Dhaka    | Dhaka       | NA     | NA | NA                           | B.1.1    |
| G-129  | EPI_ISL_600473 | Jul 2, 2020  | 19.0 | Dhaka    | Dhaka       | NA     | NA | NA                           | B.1.1    |
| G-127  | EPI_ISL_600471 | Jul 1, 2020  | 16.8 | Dhaka    | Dhaka       | NA     | NA | NA                           | B.1.1    |
| G-126  | EPI_ISL_600468 | Jul 2, 2020  | 16.0 | Dhaka    | Dhaka       | NA     | NA | NA                           | B.1.1    |
| G-123  | EPI_ISL_600466 | Jul 1, 2020  | 28.2 | Dhaka    | Dhaka       | NA     | NA | NA                           | B.1      |
| G-119  | EPI_ISL_600463 | Jun 20, 2020 | 24.0 | Dhaka    | Dhaka       | NA     | NA | NA                           | B.1.5.12 |
| G-115  | EPI_ISL_600461 | Jun 20, 2020 | 30.0 | Dhaka    | Dhaka       | NA     | NA | NA                           | B.1      |
| G-111  | EPI_ISL_600459 | Jun 20, 2020 | 28.3 | Dhaka    | Dhaka       | NA     | NA | NA                           | B.1      |
| G-110  | EPI_ISL_600456 | Jun 20, 2020 | 22.2 | Dhaka    | Dhaka       | NA     | NA | NA                           | B.1      |
| G-11   | EPI_ISL_600454 | Apr 14, 2020 | 25.5 | Dhaka    | Dhaka       | NA     | NA | Contact of Italy returnee    | B.1      |
| G-108  | EPI_ISL_600451 | Jun 20, 2020 | 26.0 | Dhaka    | Dhaka       | NA     | NA | NA                           | B.1      |
| G-106  | EPI_ISL_600449 | Jun 20, 2020 | 23.2 | Dhaka    | Dhaka       | NA     | NA | NA                           | B.1      |
| G-104  | EPI_ISL_600446 | Jul 1, 2020  | 23.0 | Dhaka    | Dhaka       | NA     | NA | NA                           | B.1.1.1  |
| G-103  | EPI_ISL_600445 | Jun 19, 2020 | 24.1 | Dhaka    | Dhaka       | NA     | NA | NA                           | B.1.1    |
| G-10   | EPI_ISL_600444 | Apr 14, 2020 | 23.5 | Dhaka    | Narayanganj | NA     | 40 | NA                           | B.1.1    |
| 638    | EPI_ISL_600443 | Apr 14, 2020 | 29.8 | Dhaka    | Dhaka       | NA     | NA | NA                           | B.1      |
| 374    | EPI_ISL_600442 | Mar 20, 2020 | 27.0 | Dhaka    | Dhaka       | Male   | 32 | NA                           | B.2.1    |
| 361    | EPI_ISL_600441 | Apr 5, 2020  | 26.3 | Dhaka    | Narayanganj | Female | 38 | NA                           | B.1.1    |
| 294    | EPI_ISL_600440 | Mar 17, 2020 | 23.0 | Dhaka    | Madaripur   | Female | NA | Contact of Italy returnee    | B.1      |
| 29156  | EPI_ISL_600439 | Apr 5, 2020  | 23.5 | Dhaka    | Dhaka       | NA     | NA | NA                           | B.1.1    |
| 2802   | EPI_ISL_600438 | Mar 7, 2020  | 29.7 | Dhaka    | Narayanganj | Male   | NA | Italy returnee               | B.1      |
| 2702   | EPI_ISL_600437 | May 2, 2020  | 19.6 | Dhaka    | Dhaka       | Male   | 50 | NA                           | B.1.5.12 |
| 256    | EPI_ISL_600436 | Mar 15, 2020 | 20.4 | Dhaka    | Dhaka       | Male   | 74 | NA                           | B.1      |
| 250    | EPI_ISL_600435 | Apr 10, 2020 | 26.2 | Barishal | Barishal    | Female | 40 | Contact of COVID-19 positive | B.1.5.12 |
| 203    | EPI_ISL_600434 | Apr 9, 2020  | 22.0 | Barishal | Barishal    | Male   | 6M | Contact of Sample ID 201     | B.1.5    |
| 202    | EPI_ISL_600433 | Apr 9, 2020  | 24.2 | Barishal | Barishal    | Female | 21 | Contact of COVID-19 positive | B.1.5.12 |
| 201    | EPI_ISL_600432 | Apr 9, 2020  | 24.4 | Barishal | Barishal    | Male   | 27 | Traveler                     | B.1.5.12 |
| 1757   | EPI_ISL_600431 | Mar 13, 2020 | 28.3 | Dhaka    | Dhaka       | NA     | NA | NA                           | B.1.5.12 |
| 1138   | EPI_ISL_600430 | Apr 20, 2020 | 27.2 | Dhaka    | Narayanganj | Male   | 45 | NA                           | B.1.5.12 |
| 110    | EPI_ISL_600429 | Apr 8, 2020  | 31.5 | Barishal | Barguna     | Male   | NA | NA                           | A.9      |
| 109879 | EPI_ISL_600428 | Apr 9, 2020  | 31.1 | Barishal | Barishal    | NA     | 35 | NA                           | B.1.1    |

**Supplementary Table 2: 324 SARS-CoV-2 sequences sampled in Bangladesh sourced from GISAID and metadata detailed on sample date, division collected in, assigned pangolin lineage**

| <b>Strain name</b>           | <b>Date</b>  | <b>Division</b> | <b>Lineage</b> | <b>Originated</b>               |
|------------------------------|--------------|-----------------|----------------|---------------------------------|
| Bangladesh/NIB-BCSIR-02/2020 | May 11, 2020 | Dhaka           | B              | UK, China, USA                  |
| Bangladesh/NIB-01/2020       | May 11, 2020 | NA              | B.1.1          | UK, USA, Portugal               |
| Bangladesh/NGRI-NSTU-31/2020 | Jul 21, 2020 | Chattogram      | B.1.36         | India, Saudi Arabia, Bangladesh |
| Bangladesh/NGRI-NSTU-21/2020 | Jul 20, 2020 | Chattogram      | B.1.36         | India, Saudi Arabia, Bangladesh |
| Bangladesh/NGRI-NSTU-18/2020 | Jul 21, 2020 | Chattogram      | B.1.1.25       | Bangladesh, UK, Australia       |
| Bangladesh/NGRI-NSTU-16/2020 | Jul 21, 2020 | Chattogram      | B.1.1.25       | Bangladesh, UK, Australia       |
| Bangladesh/NGRI-NSTU-06/2020 | Jul 23, 2020 | Chattogram      | B.1            | UK, USA, Australia              |
| Bangladesh/NGRI-NSTU-05/2020 | Jul 23, 2020 | Chattogram      | B.1.36         | India, Saudi Arabia, Bangladesh |
| Bangladesh/NGRI-NSTU-03/2020 | Jul 22, 2020 | Chattogram      | B.1.1.25       | Bangladesh, UK, Australia       |
| Bangladesh/NGRI-NSTU-02/2020 | Jul 22, 2020 | Chattogram      | B.1.36         | India, Saudi Arabia, Bangladesh |
| Bangladesh/JUST-GC40.86/2020 | Jun 11, 2020 | Khulna          | B.1            | UK, USA, Australia              |
| Bangladesh/JUST-GC40.38/2020 | Jun 11, 2020 | Khulna          | B.1            | UK, USA, Australia              |
| Bangladesh/JUST-GC15.09/2020 | May 6, 2020  | Khulna          | B.1            | UK, USA, Australia              |
| Bangladesh/icddrb-2083/2020  | Jun 7, 2020  | NA              | B.1.1.25       | Bangladesh, UK, Australia       |
| Bangladesh/DU-CARS-5586/2020 | May 13, 2020 | Dhaka           | B.1.1.25       | Bangladesh, UK, Australia       |
| Bangladesh/DU-50768/2020     | May 6, 2020  | Dhaka           | B.1            | UK, USA, Australia              |
| Bangladesh/DU-50761/2020     | May 6, 2020  | Dhaka           | B.1.1.25       | Bangladesh, UK, Australia       |
| Bangladesh/DU-50758/2020     | May 6, 2020  | Dhaka           | B.1.1.25       | Bangladesh, UK, Australia       |
| Bangladesh/DU-50740/2020     | May 6, 2020  | Dhaka           | B.1.1.25       | Bangladesh, UK, Australia       |
| Bangladesh/DNAS-CPH-471/2020 | Apr 28, 2020 | Dhaka           | B.1.1.25       | Bangladesh, UK, Australia       |
| Bangladesh/DNAS-CPH-467/2020 | Apr 28, 2020 | Dhaka           | B.1.1.25       | Bangladesh, UK, Australia       |
| Bangladesh/DNAS-CPH-466/2020 | Apr 28, 2020 | Dhaka           | B.1            | UK, USA, Australia              |
| Bangladesh/DNAS-CPH-436/2020 | Apr 28, 2020 | Dhaka           | B.1.1.25       | Bangladesh, UK, Australia       |
| Bangladesh/DNAS-CPH-427/2020 | Apr 28, 2020 | Dhaka           | B.1.1.25       | Bangladesh, UK, Australia       |
| Bangladesh/CHRF-0031/2020    | Jun 16, 2020 | NA              | B.1.1.25       | Bangladesh, UK, Australia       |
| Bangladesh/CHRF-0030/2020    | Jun 11, 2020 | NA              | B.1.36         | India, Saudi Arabia, Bangladesh |
| Bangladesh/CHRF-0029/2020    | Jun 17, 2020 | NA              | B.1.1.25       | Bangladesh, UK, Australia       |
| Bangladesh/CHRF-0028/2020    | Jun 18, 2020 | NA              | B.1.1.25       | Bangladesh, UK, Australia       |
| Bangladesh/CHRF-0027/2020    | Jun 16, 2020 | NA              | B.1.1.25       | Bangladesh, UK, Australia       |
| Bangladesh/CHRF-0025/2020    | Jun 14, 2020 | NA              | B.1.1.25       | Bangladesh, UK, Australia       |
| Bangladesh/CHRF-0024/2020    | Jun 14, 2020 | NA              | B.1.36         | India, Saudi Arabia, Bangladesh |
| Bangladesh/CHRF-0023/2020    | Jun 12, 2020 | NA              | B.1.1.25       | Bangladesh, UK, Australia       |
| Bangladesh/CHRF-0022/2020    | Jun 14, 2020 | NA              | B.1.1.25       | Bangladesh, UK, Australia       |
| Bangladesh/CHRF-0021/2020    | May 14, 2020 | NA              | B.1            | UK, USA, Australia              |
| Bangladesh/CHRF-0020/2020    | May 30, 2020 | NA              | B.1.1.25       | Bangladesh, UK, Australia       |
| Bangladesh/CHRF-0019/2020    | May 14, 2020 | NA              | B.1            | UK, USA, Australia              |
| Bangladesh/CHRF-0018/2020    | May 8, 2020  | NA              | B.1.1.25       | Bangladesh, UK, Australia       |
| Bangladesh/CHRF-0017/2020    | May 30, 2020 | NA              | B.1.1.25       | Bangladesh, UK, Australia       |

|                                  |              |            |          |                                 |
|----------------------------------|--------------|------------|----------|---------------------------------|
| Bangladesh/CHRF-0016/2020        | May 23, 2020 | NA         | B.1.1.25 | Bangladesh, UK, Australia       |
| Bangladesh/CHRF-0015/2020        | May 2, 2020  | NA         | B.1      | UK, USA, Australia              |
| Bangladesh/CHRF-0014/2020        | May 21, 2020 | NA         | B.1.1.25 | Bangladesh, UK, Australia       |
| Bangladesh/CHRF-0013/2020        | May 9, 2020  | NA         | B.1.1.25 | Bangladesh, UK, Australia       |
| Bangladesh/CHRF-0012/2020        | May 5, 2020  | NA         | B.1.1.25 | Bangladesh, UK, Australia       |
| Bangladesh/CHRF-0011/2020        | Mar 30, 2020 | NA         | B.1      | UK, USA, Australia              |
| Bangladesh/CHRF-0010/2020        | May 3, 2020  | Dhaka      | B.1      | UK, USA, Australia              |
| Bangladesh/CHRF-0009/2020        | Apr 8, 2020  | Dhaka      | B.1.1.25 | Bangladesh, UK, Australia       |
| Bangladesh/CHRF-0008/2020        | May 16, 2020 | Dhaka      | B.1.1.25 | Bangladesh, UK, Australia       |
| Bangladesh/CHRF-0007/2020        | May 14, 2020 | Dhaka      | B.1      | UK, USA, Australia              |
| Bangladesh/CHRF-0006/2020        | May 17, 2020 | Chattogram | B.1.36   | India, Saudi Arabia, Bangladesh |
| Bangladesh/CHRF-0005/2020        | May 10, 2020 | Dhaka      | B.1.1.25 | Bangladesh, UK, Australia       |
| Bangladesh/CHRF-0004/2020        | Apr 17, 2020 | Dhaka      | B.1.1.25 | Bangladesh, UK, Australia       |
| Bangladesh/CHRF-0003/2020        | Apr 17, 2020 | Dhaka      | B.1.1.25 | Bangladesh, UK, Australia       |
| Bangladesh/CHRF-0002/2020        | Apr 20, 2020 | Dhaka      | B.1      | UK, USA, Australia              |
| Bangladesh/CHRF-0001/2020        | Apr 18, 2020 | Dhaka      | B.1.1.25 | Bangladesh, UK, Australia       |
| Bangladesh/BCSIR-NILMRC-387/2020 | Jul 18, 2020 | Chattogram | B.1.1.25 | Bangladesh, UK, Australia       |
| Bangladesh/BCSIR-NILMRC-386/2020 | Jul 21, 2020 | Chattogram | B.1.1.25 | Bangladesh, UK, Australia       |
| Bangladesh/BCSIR-NILMRC-385/2020 | Jul 21, 2020 | Chattogram | B.1.1.25 | Bangladesh, UK, Australia       |
| Bangladesh/BCSIR-NILMRC-384/2020 | Jul 21, 2020 | Chattogram | B.1.1.25 | Bangladesh, UK, Australia       |
| Bangladesh/BCSIR-NILMRC-383/2020 | Jul 21, 2020 | Chattogram | B.1.1.25 | Bangladesh, UK, Australia       |
| Bangladesh/BCSIR-NILMRC-382/2020 | Jul 21, 2020 | Chattogram | B.1.1.25 | Bangladesh, UK, Australia       |
| Bangladesh/BCSIR-NILMRC-381/2020 | Jul 21, 2020 | Chattogram | B.1.36   | India, Saudi Arabia, Bangladesh |
| Bangladesh/BCSIR-NILMRC-374/2020 | Jul 31, 2020 | Dhaka      | B.1.1.60 | UK, Austria, Bangladesh         |
| Bangladesh/BCSIR-NILMRC-372/2020 | Jul 31, 2020 | Dhaka      | B.1.1    | UK, USA, Portugal               |
| Bangladesh/BCSIR-NILMRC-371/2020 | Jul 31, 2020 | Dhaka      | B.1.1.25 | Bangladesh, UK, Australia       |
| Bangladesh/BCSIR-NILMRC-370/2020 | Jul 21, 2020 | Chattogram | B.1.1.25 | Bangladesh, UK, Australia       |
| Bangladesh/BCSIR-NILMRC-369/2020 | Jul 21, 2020 | Chattogram | B.1.1.25 | Bangladesh, UK, Australia       |
| Bangladesh/BCSIR-NILMRC-368/2020 | Jul 21, 2020 | Chattogram | B.1.1.25 | Bangladesh, UK, Australia       |
| Bangladesh/BCSIR-NILMRC-367/2020 | Jul 21, 2020 | Chattogram | B.1.1.25 | Bangladesh, UK, Australia       |
| Bangladesh/BCSIR-NILMRC-365/2020 | Jul 21, 2020 | Chattogram | B.1.1    | UK, USA, Portugal               |
| Bangladesh/BCSIR-NILMRC-364/2020 | Jul 24, 2020 | Chattogram | B.1.1.25 | Bangladesh, UK, Australia       |
| Bangladesh/BCSIR-NILMRC-363/2020 | Jul 24, 2020 | Chattogram | B.1.1    | UK, USA, Portugal               |
| Bangladesh/BCSIR-NILMRC-362/2020 | Jul 24, 2020 | Chattogram | B.1.1    | UK, USA, Portugal               |
| Bangladesh/BCSIR-NILMRC-361/2020 | Jul 24, 2020 | Chattogram | B.1.1    | UK, USA, Portugal               |
| Bangladesh/BCSIR-NILMRC-359/2020 | Jul 24, 2020 | Chattogram | B.1.1.25 | Bangladesh, UK, Australia       |
| Bangladesh/BCSIR-NILMRC-358/2020 | Jul 24, 2020 | Chattogram | B.1.1.25 | Bangladesh, UK, Australia       |
| Bangladesh/BCSIR-NILMRC-356/2020 | Jul 24, 2020 | Chattogram | B.1.1.25 | Bangladesh, UK, Australia       |
| Bangladesh/BCSIR-NILMRC-354/2020 | Jul 15, 2020 | Khulna     | B.1.1.25 | Bangladesh, UK, Australia       |

|                                  |              |            |          |                                 |
|----------------------------------|--------------|------------|----------|---------------------------------|
| Bangladesh/BCSIR-NILMRC-353/2020 | Jul 15, 2020 | Khulna     | B.1.1.25 | Bangladesh, UK, Australia       |
| Bangladesh/BCSIR-NILMRC-352/2020 | Jul 15, 2020 | Khulna     | B.1.1.25 | Bangladesh, UK, Australia       |
| Bangladesh/BCSIR-NILMRC-351/2020 | Jul 15, 2020 | Khulna     | B.1.36   | India, Saudi Arabia, Bangladesh |
| Bangladesh/BCSIR-NILMRC-350/2020 | Jul 15, 2020 | Khulna     | B.1.1.25 | Bangladesh, UK, Australia       |
| Bangladesh/BCSIR-NILMRC-349/2020 | Jul 15, 2020 | Khulna     | B.1.1.25 | Bangladesh, UK, Australia       |
| Bangladesh/BCSIR-NILMRC-346/2020 | Jul 15, 2020 | Rajshahi   | B.1.1    | UK, USA, Portugal               |
| Bangladesh/BCSIR-NILMRC-345/2020 | Jul 12, 2020 | Rajshahi   | B.1.1.25 | Bangladesh, UK, Australia       |
| Bangladesh/BCSIR-NILMRC-344/2020 | Jul 12, 2020 | Rajshahi   | B.1.1.25 | Bangladesh, UK, Australia       |
| Bangladesh/BCSIR-NILMRC-343/2020 | Jul 15, 2020 | Rajshahi   | B.1.36   | India, Saudi Arabia, Bangladesh |
| Bangladesh/BCSIR-NILMRC-342/2020 | Jul 15, 2020 | Rajshahi   | B.1.1.25 | Bangladesh, UK, Australia       |
| Bangladesh/BCSIR-NILMRC-341/2020 | Jul 15, 2020 | Rajshahi   | B.1.1.25 | Bangladesh, UK, Australia       |
| Bangladesh/BCSIR-NILMRC-340/2020 | Jul 15, 2020 | Rajshahi   | B.1.1.25 | Bangladesh, UK, Australia       |
| Bangladesh/BCSIR-NILMRC-339/2020 | Jul 15, 2020 | Rajshahi   | B.1.1.25 | Bangladesh, UK, Australia       |
| Bangladesh/BCSIR-NILMRC-338/2020 | Jul 15, 2020 | Rajshahi   | B.1.1.25 | Bangladesh, UK, Australia       |
| Bangladesh/BCSIR-NILMRC-333/2020 | Jun 4, 2020  | Mymensingh | B.1.1.25 | Bangladesh, UK, Australia       |
| Bangladesh/BCSIR-NILMRC-330/2020 | Jun 3, 2020  | Mymensingh | B.1.1.25 | Bangladesh, UK, Australia       |
| Bangladesh/BCSIR-NILMRC-329/2020 | Jun 3, 2020  | Mymensingh | B.1.1    | UK, USA, Portugal               |
| Bangladesh/BCSIR-NILMRC-328/2020 | Jun 3, 2020  | Mymensingh | B.1.1.25 | Bangladesh, UK, Australia       |
| Bangladesh/BCSIR-NILMRC-327/2020 | Jun 3, 2020  | Mymensingh | B.1.1    | UK, USA, Portugal               |
| Bangladesh/BCSIR-NILMRC-326/2020 | Jun 3, 2020  | Mymensingh | B.1.1    | UK, USA, Portugal               |
| Bangladesh/BCSIR-NILMRC-323/2020 | Jun 3, 2020  | Mymensingh | B.1.1.25 | Bangladesh, UK, Australia       |
| Bangladesh/BCSIR-NILMRC-322/2020 | May 31, 2020 | Mymensingh | B.1.1.25 | Bangladesh, UK, Australia       |
| Bangladesh/BCSIR-NILMRC-321/2020 | May 31, 2020 | Mymensingh | B.1.1.25 | Bangladesh, UK, Australia       |
| Bangladesh/BCSIR-NILMRC-320/2020 | May 31, 2020 | Mymensingh | B.1.1.25 | Bangladesh, UK, Australia       |
| Bangladesh/BCSIR-NILMRC-319/2020 | May 31, 2020 | Mymensingh | B.1.1.25 | Bangladesh, UK, Australia       |
| Bangladesh/BCSIR-NILMRC-318/2020 | May 31, 2020 | Mymensingh | B.1.1.25 | Bangladesh, UK, Australia       |
| Bangladesh/BCSIR-NILMRC-317/2020 | May 31, 2020 | Mymensingh | B.1.1.25 | Bangladesh, UK, Australia       |
| Bangladesh/BCSIR-NILMRC-315/2020 | May 31, 2020 | Mymensingh | B.1.1.25 | Bangladesh, UK, Australia       |
| Bangladesh/BCSIR-NILMRC-312/2020 | Jul 20, 2020 | Sylhet     | B.1.1.25 | Bangladesh, UK, Australia       |
| Bangladesh/BCSIR-NILMRC-311/2020 | Jul 19, 2020 | Sylhet     | B.1.1    | UK, USA, Portugal               |
| Bangladesh/BCSIR-NILMRC-307/2020 | Jul 18, 2020 | Sylhet     | B.1.1.25 | Bangladesh, UK, Australia       |
| Bangladesh/BCSIR-NILMRC-306/2020 | Jul 18, 2020 | Sylhet     | B.1.1    | UK, USA, Portugal               |
| Bangladesh/BCSIR-NILMRC-305/2020 | Jul 18, 2020 | Sylhet     | B.1.1    | UK, USA, Portugal               |
| Bangladesh/BCSIR-NILMRC-298/2020 | Jul 18, 2020 | Sylhet     | B.1.1.25 | Bangladesh, UK, Australia       |
| Bangladesh/BCSIR-NILMRC-297/2020 | Jul 18, 2020 | Sylhet     | B.1.1.25 | Bangladesh, UK, Australia       |
| Bangladesh/BCSIR-NILMRC-296/2020 | Jul 18, 2020 | Sylhet     | B.1.1.25 | Bangladesh, UK, Australia       |
| Bangladesh/BCSIR-NILMRC-295/2020 | Jul 18, 2020 | Sylhet     | B.1.1.25 | Bangladesh, UK, Australia       |
| Bangladesh/BCSIR-NILMRC-293/2020 | May 31, 2020 | Sylhet     | B.1.1    | UK, USA, Portugal               |
| Bangladesh/BCSIR-NILMRC-292/2020 | Jul 17, 2020 | Sylhet     | B.1.1.25 | Bangladesh, UK, Australia       |

|                                  |              |            |          |                                 |
|----------------------------------|--------------|------------|----------|---------------------------------|
| Bangladesh/BCSIR-NILMRC-291/2020 | Jul 18, 2020 | Sylhet     | B.1.1.25 | Bangladesh, UK, Australia       |
| Bangladesh/BCSIR-NILMRC-290/2020 | Jul 14, 2020 | Rangpur    | B.1.1.25 | Bangladesh, UK, Australia       |
| Bangladesh/BCSIR-NILMRC-288/2020 | Jul 14, 2020 | Rangpur    | B.1.36   | India, Saudi Arabia, Bangladesh |
| Bangladesh/BCSIR-NILMRC-287/2020 | Jul 14, 2020 | Rangpur    | B.1.1    | UK, USA, Portugal               |
| Bangladesh/BCSIR-NILMRC-285/2020 | Jul 21, 2020 | Chattogram | B.1.1.25 | Bangladesh, UK, Australia       |
| Bangladesh/BCSIR-NILMRC-284/2020 | Jul 21, 2020 | Chattogram | B.1.1.25 | Bangladesh, UK, Australia       |
| Bangladesh/BCSIR-NILMRC-283/2020 | Jul 21, 2020 | Chattogram | B.1.1.25 | Bangladesh, UK, Australia       |
| Bangladesh/BCSIR-NILMRC-282/2020 | Jul 21, 2020 | Chattogram | B.1.1.25 | Bangladesh, UK, Australia       |
| Bangladesh/BCSIR-NILMRC-281/2020 | Jul 21, 2020 | Chattogram | B.1.1.25 | Bangladesh, UK, Australia       |
| Bangladesh/BCSIR-NILMRC-280/2020 | Jul 21, 2020 | Chattogram | B.1.1.25 | Bangladesh, UK, Australia       |
| Bangladesh/BCSIR-NILMRC-278/2020 | Jul 19, 2020 | Chattogram | B.1.1.25 | Bangladesh, UK, Australia       |
| Bangladesh/BCSIR-NILMRC-276/2020 | Jul 19, 2020 | Chattogram | B.1.1.25 | Bangladesh, UK, Australia       |
| Bangladesh/BCSIR-NILMRC-275/2020 | Jul 19, 2020 | Chattogram | B.1.1.25 | Bangladesh, UK, Australia       |
| Bangladesh/BCSIR-NILMRC-274/2020 | Jul 19, 2020 | Chattogram | B.1.1.25 | Bangladesh, UK, Australia       |
| Bangladesh/BCSIR-NILMRC-273/2020 | Jul 19, 2020 | Chattogram | B.1.1    | UK, USA, Portugal               |
| Bangladesh/BCSIR-NILMRC-269/2020 | Jul 19, 2020 | Chattogram | B.1.1.25 | Bangladesh, UK, Australia       |
| Bangladesh/BCSIR-NILMRC-268/2020 | Jul 19, 2020 | Chattogram | B.1.1.25 | Bangladesh, UK, Australia       |
| Bangladesh/BCSIR-NILMRC-265/2020 | Jul 19, 2020 | Chattogram | B.1.1.25 | Bangladesh, UK, Australia       |
| Bangladesh/BCSIR-NILMRC-264/2020 | Jul 16, 2020 | Chattogram | B.1.1.25 | Bangladesh, UK, Australia       |
| Bangladesh/BCSIR-NILMRC-263/2020 | Jul 7, 2020  | Khulna     | B.1.1    | UK, USA, Portugal               |
| Bangladesh/BCSIR-NILMRC-262/2020 | Jul 7, 2020  | Khulna     | B.1.1    | UK, USA, Portugal               |
| Bangladesh/BCSIR-NILMRC-261/2020 | Jul 7, 2020  | Khulna     | B.1.1.25 | Bangladesh, UK, Australia       |
| Bangladesh/BCSIR-NILMRC-260/2020 | Jul 7, 2020  | Khulna     | B.1.1.25 | Bangladesh, UK, Australia       |
| Bangladesh/BCSIR-NILMRC-259/2020 | Jul 7, 2020  | Khulna     | B.1.1.25 | Bangladesh, UK, Australia       |
| Bangladesh/BCSIR-NILMRC-258/2020 | Jul 7, 2020  | Khulna     | B.1.1.25 | Bangladesh, UK, Australia       |
| Bangladesh/BCSIR-NILMRC-257/2020 | Jul 7, 2020  | Khulna     | B.1.36   | India, Saudi Arabia, Bangladesh |
| Bangladesh/BCSIR-NILMRC-256/2020 | Jul 7, 2020  | Khulna     | B.1.1.25 | Bangladesh, UK, Australia       |
| Bangladesh/BCSIR-NILMRC-255/2020 | Jul 7, 2020  | Khulna     | B.1.1.25 | Bangladesh, UK, Australia       |
| Bangladesh/BCSIR-NILMRC-254/2020 | Jul 7, 2020  | Khulna     | B.1.1.25 | Bangladesh, UK, Australia       |
| Bangladesh/BCSIR-NILMRC-253/2020 | Jul 7, 2020  | Khulna     | B.1.1.25 | Bangladesh, UK, Australia       |
| Bangladesh/BCSIR-NILMRC-251/2020 | Jul 7, 2020  | Khulna     | B.1.1.25 | Bangladesh, UK, Australia       |
| Bangladesh/BCSIR-NILMRC-250/2020 | Jul 7, 2020  | Khulna     | B.1.1.25 | Bangladesh, UK, Australia       |
| Bangladesh/BCSIR-NILMRC-249/2020 | Jul 7, 2020  | Khulna     | B.1.1.25 | Bangladesh, UK, Australia       |
| Bangladesh/BCSIR-NILMRC-248/2020 | Jul 7, 2020  | Khulna     | B.1.1.25 | Bangladesh, UK, Australia       |
| Bangladesh/BCSIR-NILMRC-247/2020 | Jul 7, 2020  | Khulna     | B.1.1.25 | Bangladesh, UK, Australia       |
| Bangladesh/BCSIR-NILMRC-246/2020 | Jul 7, 2020  | Khulna     | B.1.1.25 | Bangladesh, UK, Australia       |
| Bangladesh/BCSIR-NILMRC-245/2020 | Jul 6, 2020  | Barishal   | B.1.1.25 | Bangladesh, UK, Australia       |
| Bangladesh/BCSIR-NILMRC-244/2020 | Jul 6, 2020  | Barishal   | B.1.1.25 | Bangladesh, UK, Australia       |
| Bangladesh/BCSIR-NILMRC-243/2020 | Jul 6, 2020  | Barishal   | B.1.1.25 | Bangladesh, UK, Australia       |



|                                  |              |            |          |                                 |
|----------------------------------|--------------|------------|----------|---------------------------------|
| Bangladesh/BCSIR-NILMRC-242/2020 | Jul 6, 2020  | Barishal   | B.1.1.25 | Bangladesh, UK, Australia       |
| Bangladesh/BCSIR-NILMRC-241/2020 | Jul 6, 2020  | Barishal   | B.1.1.25 | Bangladesh, UK, Australia       |
| Bangladesh/BCSIR-NILMRC-240/2020 | Jul 6, 2020  | Barishal   | B.1.1.25 | Bangladesh, UK, Australia       |
| Bangladesh/BCSIR-NILMRC-239/2020 | Jul 6, 2020  | Barishal   | B.1.1.25 | Bangladesh, UK, Australia       |
| Bangladesh/BCSIR-NILMRC-238/2020 | Jul 6, 2020  | Barishal   | B.1.1.25 | Bangladesh, UK, Australia       |
| Bangladesh/BCSIR-NILMRC-237/2020 | Jul 6, 2020  | Barishal   | B.1.1.25 | Bangladesh, UK, Australia       |
| Bangladesh/BCSIR-NILMRC-236/2020 | Jul 6, 2020  | Barishal   | B.1.1    | UK, USA, Portugal               |
| Bangladesh/BCSIR-NILMRC-235/2020 | Jul 6, 2020  | Barishal   | B.1.1.25 | Bangladesh, UK, Australia       |
| Bangladesh/BCSIR-NILMRC-234/2020 | Jul 6, 2020  | Barishal   | B.1.1    | UK, USA, Portugal               |
| Bangladesh/BCSIR-NILMRC-233/2020 | Jul 6, 2020  | Barishal   | B.1.1    | UK, USA, Portugal               |
| Bangladesh/BCSIR-NILMRC-232/2020 | Jul 6, 2020  | Barishal   | B.1.36   | India, Saudi Arabia, Bangladesh |
| Bangladesh/BCSIR-NILMRC-231/2020 | Jul 6, 2020  | Barishal   | B.1.1.25 | Bangladesh, UK, Australia       |
| Bangladesh/BCSIR-NILMRC-230/2020 | Jul 6, 2020  | Barishal   | B.1.1.25 | Bangladesh, UK, Australia       |
| Bangladesh/BCSIR-NILMRC-229/2020 | Jul 6, 2020  | Barishal   | B.1.1.25 | Bangladesh, UK, Australia       |
| Bangladesh/BCSIR-NILMRC-228/2020 | Jul 6, 2020  | Barishal   | B.1.159  | France, Bangladesh              |
| Bangladesh/BCSIR-NILMRC-227/2020 | Jul 6, 2020  | Barishal   | B.1.1.25 | Bangladesh, UK, Australia       |
| Bangladesh/BCSIR-NILMRC-226/2020 | Jul 6, 2020  | Barishal   | B.1.1.25 | Bangladesh, UK, Australia       |
| Bangladesh/BCSIR-NILMRC-224/2020 | Jul 6, 2020  | Barishal   | B.1.1    | UK, USA, Portugal               |
| Bangladesh/BCSIR-NILMRC-223/2020 | Jul 6, 2020  | Barishal   | B.1.1    | UK, USA, Portugal               |
| Bangladesh/BCSIR-NILMRC-222/2020 | Jul 6, 2020  | Barishal   | B.1.1    | UK, USA, Portugal               |
| Bangladesh/BCSIR-NILMRC-220/2020 | Jun 24, 2020 | Sylhet     | B.1.36   | India, Saudi Arabia, Bangladesh |
| Bangladesh/BCSIR-NILMRC-219/2020 | Jun 24, 2020 | Sylhet     | B.1.1.25 | Bangladesh, UK, Australia       |
| Bangladesh/BCSIR-NILMRC-218/2020 | Jun 24, 2020 | Sylhet     | B.1.1.25 | Bangladesh, UK, Australia       |
| Bangladesh/BCSIR-NILMRC-217/2020 | Jun 24, 2020 | Sylhet     | B.1.1.25 | Bangladesh, UK, Australia       |
| Bangladesh/BCSIR-NILMRC-216/2020 | Jun 24, 2020 | Sylhet     | B.1.36   | India, Saudi Arabia, Bangladesh |
| Bangladesh/BCSIR-NILMRC-213/2020 | Jun 14, 2020 | Sylhet     | B.1.1    | UK, USA, Portugal               |
| Bangladesh/BCSIR-NILMRC-212/2020 | Jun 14, 2020 | Sylhet     | B.1.1.25 | Bangladesh, UK, Australia       |
| Bangladesh/BCSIR-NILMRC-211/2020 | Jun 14, 2020 | Sylhet     | B.1.1.25 | Bangladesh, UK, Australia       |
| Bangladesh/BCSIR-NILMRC-210/2020 | Jun 14, 2020 | Sylhet     | B.1.1    | UK, USA, Portugal               |
| Bangladesh/BCSIR-NILMRC-208/2020 | Jun 27, 2020 | Chattogram | B.1.1.25 | Bangladesh, UK, Australia       |
| Bangladesh/BCSIR-NILMRC-207/2020 | Jun 27, 2020 | Chattogram | B.1.1.25 | Bangladesh, UK, Australia       |
| Bangladesh/BCSIR-NILMRC-206/2020 | Jun 27, 2020 | Chattogram | B.1.1.25 | Bangladesh, UK, Australia       |
| Bangladesh/BCSIR-NILMRC-205/2020 | Jun 26, 2020 | Chattogram | B.1.1.25 | Bangladesh, UK, Australia       |
| Bangladesh/BCSIR-NILMRC-204/2020 | Jun 26, 2020 | Chattogram | B.1.36   | India, Saudi Arabia, Bangladesh |
| Bangladesh/BCSIR-NILMRC-203/2020 | Jun 20, 2020 | Chattogram | B.1.1.25 | Bangladesh, UK, Australia       |
| Bangladesh/BCSIR-NILMRC-201/2020 | Jun 20, 2020 | Chattogram | B.1.1.25 | Bangladesh, UK, Australia       |
| Bangladesh/BCSIR-NILMRC-199/2020 | Jun 20, 2020 | Chattogram | B.1.1.25 | Bangladesh, UK, Australia       |
| Bangladesh/BCSIR-NILMRC-198/2020 | Jun 20, 2020 | Chattogram | B.1.1    | UK, USA, Portugal               |
| Bangladesh/BCSIR-NILMRC-196/2020 | Jun 20, 2020 | Chattogram | B.1.1.25 | Bangladesh, UK, Australia       |

|                                  |              |            |          |                                 |
|----------------------------------|--------------|------------|----------|---------------------------------|
| Bangladesh/BCSIR-NILMRC-195/2020 | Jun 20, 2020 | Chattogram | B.1.1.25 | Bangladesh, UK, Australia       |
| Bangladesh/BCSIR-NILMRC-194/2020 | Jun 20, 2020 | Chattogram | B.1.1    | UK, USA, Portugal               |
| Bangladesh/BCSIR-NILMRC-193/2020 | Jun 17, 2020 | Chattogram | B.1.1.25 | Bangladesh, UK, Australia       |
| Bangladesh/BCSIR-NILMRC-192/2020 | Jun 17, 2020 | Chattogram | B.1.1.25 | Bangladesh, UK, Australia       |
| Bangladesh/BCSIR-NILMRC-190/2020 | Jun 17, 2020 | Chattogram | B.1.1.59 | UK, Bangladesh                  |
| Bangladesh/BCSIR-NILMRC-188/2020 | Jun 16, 2020 | Chattogram | B.1.1.25 | Bangladesh, UK, Australia       |
| Bangladesh/BCSIR-NILMRC-187/2020 | Jun 16, 2020 | Chattogram | B.1.1.25 | Bangladesh, UK, Australia       |
| Bangladesh/BCSIR-NILMRC-186/2020 | Jun 16, 2020 | Chattogram | B.1.36   | India, Saudi Arabia, Bangladesh |
| Bangladesh/BCSIR-NILMRC-184/2020 | Jun 20, 2020 | Rajshahi   | B.1.1.25 | Bangladesh, UK, Australia       |
| Bangladesh/BCSIR-NILMRC-182/2020 | Jun 20, 2020 | Rajshahi   | B.1.1    | UK, USA, Portugal               |
| Bangladesh/BCSIR-NILMRC-181/2020 | Jun 20, 2020 | Rajshahi   | B.1.1.25 | Bangladesh, UK, Australia       |
| Bangladesh/BCSIR-NILMRC-180/2020 | Jun 20, 2020 | Rajshahi   | B.1.1.25 | Bangladesh, UK, Australia       |
| Bangladesh/BCSIR-NILMRC-179/2020 | Jun 15, 2020 | Rajshahi   | B.1.1.25 | Bangladesh, UK, Australia       |
| Bangladesh/BCSIR-NILMRC-178/2020 | Jun 15, 2020 | Rajshahi   | B.1.1.25 | Bangladesh, UK, Australia       |
| Bangladesh/BCSIR-NILMRC-177/2020 | Jun 12, 2020 | Rajshahi   | B.1.1.25 | Bangladesh, UK, Australia       |
| Bangladesh/BCSIR-NILMRC-176/2020 | Jun 12, 2020 | Rajshahi   | B.1.1.25 | Bangladesh, UK, Australia       |
| Bangladesh/BCSIR-NILMRC-175/2020 | Jun 12, 2020 | Rajshahi   | B.1.1.25 | Bangladesh, UK, Australia       |
| Bangladesh/BCSIR-NILMRC-174/2020 | Jun 12, 2020 | Rajshahi   | B.1.1.25 | Bangladesh, UK, Australia       |
| Bangladesh/BCSIR-NILMRC-173/2020 | Jun 18, 2020 | Rajshahi   | B.1.1.25 | Bangladesh, UK, Australia       |
| Bangladesh/BCSIR-NILMRC-172/2020 | Jun 18, 2020 | Rajshahi   | B.1.1.25 | Bangladesh, UK, Australia       |
| Bangladesh/BCSIR-NILMRC-168/2020 | Jun 18, 2020 | Rajshahi   | B.1.1.25 | Bangladesh, UK, Australia       |
| Bangladesh/BCSIR-NILMRC-167/2020 | Jun 18, 2020 | Rajshahi   | B.1.1.25 | Bangladesh, UK, Australia       |
| Bangladesh/BCSIR-NILMRC-165/2020 | Jun 18, 2020 | Rajshahi   | B.1.1    | UK, USA, Portugal               |
| Bangladesh/BCSIR-NILMRC-161/2020 | Jun 18, 2020 | Rajshahi   | B.1.1.25 | Bangladesh, UK, Australia       |
| Bangladesh/BCSIR-NILMRC-160/2020 | Jun 18, 2020 | Rajshahi   | B.1.1.25 | Bangladesh, UK, Australia       |
| Bangladesh/BCSIR-NILMRC-158/2020 | Jun 18, 2020 | Rajshahi   | B.1.36   | India, Saudi Arabia, Bangladesh |
| Bangladesh/BCSIR-NILMRC-156/2020 | Jun 18, 2020 | Rajshahi   | B.1.1    | UK, USA, Portugal               |
| Bangladesh/BCSIR-NILMRC-155/2020 | Jun 18, 2020 | Rajshahi   | B.1.1.25 | Bangladesh, UK, Australia       |
| Bangladesh/BCSIR-NILMRC-154/2020 | Jun 18, 2020 | Rajshahi   | B.1.1    | UK, USA, Portugal               |
| Bangladesh/BCSIR-NILMRC-149/2020 | Jun 18, 2020 | Dhaka      | B.1.1.25 | Bangladesh, UK, Australia       |
| Bangladesh/BCSIR-NILMRC-144/2020 | Jun 18, 2020 | Dhaka      | B.1.1.25 | Bangladesh, UK, Australia       |
| Bangladesh/BCSIR-NILMRC-141/2020 | Jun 18, 2020 | Dhaka      | B.1.1.25 | Bangladesh, UK, Australia       |
| Bangladesh/BCSIR-NILMRC-138/2020 | Jun 18, 2020 | Dhaka      | B.1.1.25 | Bangladesh, UK, Australia       |
| Bangladesh/BCSIR-NILMRC-137/2020 | Jun 18, 2020 | Dhaka      | B.1.1.25 | Bangladesh, UK, Australia       |
| Bangladesh/BCSIR-NILMRC-135/2020 | Jun 18, 2020 | Dhaka      | B.1.1.25 | Bangladesh, UK, Australia       |
| Bangladesh/BCSIR-NILMRC-133/2020 | Jun 18, 2020 | Dhaka      | B.1.1.25 | Bangladesh, UK, Australia       |
| Bangladesh/BCSIR-NILMRC-132/2020 | Jun 18, 2020 | Dhaka      | B.1.1.25 | Bangladesh, UK, Australia       |
| Bangladesh/BCSIR-NILMRC-130/2020 | Jun 17, 2020 | Dhaka      | B.1.1    | UK, USA, Portugal               |
| Bangladesh/BCSIR-NILMRC-126/2020 | Jun 17, 2020 | Rajshahi   | B.1.1.25 | Bangladesh, UK, Australia       |



|                                    |              |            |          |                                 |
|------------------------------------|--------------|------------|----------|---------------------------------|
| Bangladesh/BCSIR-NILMRC-072/2020   | May 26, 2020 | Chattogram | B.1.1.25 | Bangladesh, UK, Australia       |
| Bangladesh/BCSIR-NILMRC-071/2020   | May 26, 2020 | Chattogram | B.1.36   | India, Saudi Arabia, Bangladesh |
| Bangladesh/BCSIR-NILMRC-070/2020   | May 26, 2020 | Chattogram | B.1.36   | India, Saudi Arabia, Bangladesh |
| Bangladesh/BCSIR-NILMRC-069/2020   | May 26, 2020 | Chattogram | B.1.36   | India, Saudi Arabia, Bangladesh |
| Bangladesh/BCSIR-NILMRC-067/2020   | May 26, 2020 | Chattogram | B.1.36   | India, Saudi Arabia, Bangladesh |
| Bangladesh/BCSIR-NILMRC-066/2020   | May 26, 2020 | Chattogram | B.1.1.25 | Bangladesh, UK, Australia       |
| Bangladesh/BCSIR-NILMRC-064/2020   | May 31, 2020 | Dhaka      | B.1.1.25 | Bangladesh, UK, Australia       |
| Bangladesh/BCSIR-NILMRC-062/2020   | May 31, 2020 | Dhaka      | B.1.1.25 | Bangladesh, UK, Australia       |
| Bangladesh/BCSIR-NILMRC-060/2020   | May 10, 2020 | Dhaka      | B.1.1.25 | Bangladesh, UK, Australia       |
| Bangladesh/BCSIR-NILMRC-059/2020   | May 10, 2020 | Dhaka      | B.1.1.25 | Bangladesh, UK, Australia       |
| Bangladesh/BCSIR-NILMRC-058/2020   | May 10, 2020 | Dhaka      | B.1.1.25 | Bangladesh, UK, Australia       |
| Bangladesh/BCSIR-NILMRC-057/2020   | May 10, 2020 | Dhaka      | B.1.1    | UK, USA, Portugal               |
| Bangladesh/BCSIR-NILMRC-056/2020   | May 10, 2020 | Dhaka      | B.1.1.25 | Bangladesh, UK, Australia       |
| Bangladesh/BCSIR-NILMRC-054/2020   | Jun 1, 2020  | Dhaka      | B.1.1.25 | Bangladesh, UK, Australia       |
| Bangladesh/BCSIR-NILMRC-053/2020   | May 7, 2020  | Dhaka      | B.1.1.25 | Bangladesh, UK, Australia       |
| Bangladesh/BCSIR-NILMRC-052/2020   | Jun 1, 2020  | Dhaka      | B.1.1    | UK, USA, Portugal               |
| Bangladesh/BCSIR-NILMRC-051/2020   | May 7, 2020  | Dhaka      | B.1.1.25 | Bangladesh, UK, Australia       |
| Bangladesh/BCSIR-NILMRC-050/2020   | May 21, 2020 | Dhaka      | B.1.1.25 | Bangladesh, UK, Australia       |
| Bangladesh/BCSIR-NILMRC-042/2020   | May 23, 2020 | Dhaka      | B.1.1.25 | Bangladesh, UK, Australia       |
| Bangladesh/BCSIR-NILMRC-025/2020   | May 24, 2020 | Dhaka      | B.1.1    | UK, USA, Portugal               |
| Bangladesh/BCSIR-NILMRC-021/2020   | May 24, 2020 | Dhaka      | B.1.1.25 | Bangladesh, UK, Australia       |
| Bangladesh/BCSIR-NILMRC-018/2020   | May 24, 2020 | Dhaka      | B.1.1    | UK, USA, Portugal               |
| Bangladesh/BCSIR-NILMRC-017/2020   | May 24, 2020 | Dhaka      | B.1.1.25 | Bangladesh, UK, Australia       |
| Bangladesh/BCSIR-NILMRC-015/2020   | May 23, 2020 | Dhaka      | B.1.1.25 | Bangladesh, UK, Australia       |
| Bangladesh/BCSIR-NILMRC-009/2020   | May 23, 2020 | Dhaka      | B.1.1.25 | Bangladesh, UK, Australia       |
| Bangladesh/BCSIR-NILMRC-008/2020   | May 21, 2020 | Dhaka      | B.1.1.25 | Bangladesh, UK, Australia       |
| Bangladesh/BCSIR-NILMRC-007/2020   | May 21, 2020 | Dhaka      | B.1.1    | UK, USA, Portugal               |
| Bangladesh/BCSIR-NILMRC-006/2020   | May 21, 2020 | Dhaka      | B.1.1.25 | Bangladesh, UK, Australia       |
| Bangladesh/BCSIR-NILMRC-006.2/2020 | May 23, 2020 | Dhaka      | B.1.1.25 | Bangladesh, UK, Australia       |
| Bangladesh/BCSIR-NILMRC-005/2020   | May 23, 2020 | Dhaka      | B.1.1.25 | Bangladesh, UK, Australia       |
| Bangladesh/BCSIR-NILMRC-004-2/2020 | May 21, 2020 | Dhaka      | B.1.1.25 | Bangladesh, UK, Australia       |
| Bangladesh/BCSIR-NILMRC-004/2020   | May 23, 2020 | Dhaka      | B.1.1.25 | Bangladesh, UK, Australia       |
| Bangladesh/BCSIR-NILMRC-003/2020   | May 23, 2020 | Dhaka      | B.1.1.25 | Bangladesh, UK, Australia       |
| Bangladesh/BCSIR-NILMRC-002/2020   | May 23, 2020 | Dhaka      | B.1.1.25 | Bangladesh, UK, Australia       |
| Bangladesh/BCSIR-NILMRC_153/2020   | Jun 18, 2020 | Rajshahi   | B.1.1.25 | Bangladesh, UK, Australia       |
| Bangladesh/BCSIR-NILMRC_152/2020   | Jun 18, 2020 | Dhaka      | B.1.1.25 | Bangladesh, UK, Australia       |
| Bangladesh/BCSIR-NILMRC_151/2020   | Jun 18, 2020 | Dhaka      | B.1.1    | UK, USA, Portugal               |
| Bangladesh/BCSIR-NILMRC_150/2020   | Jun 18, 2020 | Dhaka      | B.1.1.25 | Bangladesh, UK, Australia       |
| Bangladesh/BCSIR-NILMRC_146/2020   | Jun 18, 2020 | Dhaka      | B.1.1.25 | Bangladesh, UK, Australia       |

|                                    |              |            |          |                                 |
|------------------------------------|--------------|------------|----------|---------------------------------|
| Bangladesh/BCSIR-NILMRC_145/2020   | Jun 18, 2020 | Dhaka      | B.1.1.25 | Bangladesh, UK, Australia       |
| Bangladesh/BCSIR-NILMRC_139/2020   | Jun 18, 2020 | Dhaka      | B.1.1.25 | Bangladesh, UK, Australia       |
| Bangladesh/BCSIR-NILMRC_131/2020   | Jun 18, 2020 | Dhaka      | B.1.1    | UK, USA, Portugal               |
| Bangladesh/BCSIR-NILMRC_125/2020   | Jun 17, 2020 | Rajshahi   | B.1.1.25 | Bangladesh, UK, Australia       |
| Bangladesh/BCSIR-DU-16/2020        | Jul 12, 2020 | Dhaka      | B.1.36   | India, Saudi Arabia, Bangladesh |
| Bangladesh/BARJ-CVASU-CTG-518/2020 | May 10, 2020 | Chattogram | A        | China, India, Japan             |
| Bangladesh/BARJ-CVASU-CTG-517/2020 | May 3, 2020  | Chattogram | B.1.36   | India, Saudi Arabia, Bangladesh |
| Bangladesh/BARJ-CVASU-CTG-511/2020 | May 9, 2020  | Chattogram | B.1.36   | India, Saudi Arabia, Bangladesh |
| Bangladesh/BARJ-CVASU-CTG-506/2020 | May 8, 2020  | Chattogram | A        | China, India, Japan             |
| Bangladesh/BARJ-CVASU-CTG-503/2020 | May 13, 2020 | Chattogram | A        | China, India, Japan             |
| Bangladesh/BARJ-CVASU-CTG-502/2020 | May 13, 2020 | Chattogram | A        | China, India, Japan             |
| Bangladesh/BARJ-CVASU-CTG-501/2020 | May 10, 2020 | Chattogram | A        | China, India, Japan             |
| Bangladesh/Akbiomed-01/2020        | Apr 25, 2020 | NA         | B.1      | UK, USA, Australia              |

**Supplementary Table 3: Amino acid substitution, insertion, or deletion present in 152 Bangladeshi SARS-CoV-2 sequenced isolates**

| Gene                                                | Amino acid substitution, insertion, deletion                                                                                                                                                                                                                                                                                                                                        | Isolates acquired mutation (%) |
|-----------------------------------------------------|-------------------------------------------------------------------------------------------------------------------------------------------------------------------------------------------------------------------------------------------------------------------------------------------------------------------------------------------------------------------------------------|--------------------------------|
| orf1ab                                              | NSP12_P323L                                                                                                                                                                                                                                                                                                                                                                         | 127 (83.6)                     |
|                                                     | NSP6_G107del, NSP6_S106del, NSP6_F108del                                                                                                                                                                                                                                                                                                                                            | 54 (35.5) each                 |
|                                                     | NSP2_I120F                                                                                                                                                                                                                                                                                                                                                                          | 50 (32.9)                      |
|                                                     | NSP5_K90R                                                                                                                                                                                                                                                                                                                                                                           | 42 (27.6)                      |
|                                                     | NSP2_T85I                                                                                                                                                                                                                                                                                                                                                                           | 41 (27)                        |
|                                                     | NSP13_I151V                                                                                                                                                                                                                                                                                                                                                                         | 39 (25.7)                      |
|                                                     | NSP3_N1778S, NSP3_P1228L                                                                                                                                                                                                                                                                                                                                                            | 38 (25) each                   |
|                                                     | NSP6_W31Y, NSP6_L33M, NSP6_F34V, NSP6_Q30E                                                                                                                                                                                                                                                                                                                                          | 29 (19.1) each                 |
|                                                     | NSP6_ins35VL                                                                                                                                                                                                                                                                                                                                                                        | 26 (17.1)                      |
|                                                     | NSP6_T29P                                                                                                                                                                                                                                                                                                                                                                           | 18 (11.8)                      |
|                                                     | NSP3_T183I, NSP3_A890D                                                                                                                                                                                                                                                                                                                                                              | 14 (9.2) each                  |
|                                                     | NSP3_I1412T                                                                                                                                                                                                                                                                                                                                                                         | 13 (8.6)                       |
|                                                     | NSP6_T29P                                                                                                                                                                                                                                                                                                                                                                           | 12 (7.9)                       |
|                                                     | NSP12_P227L                                                                                                                                                                                                                                                                                                                                                                         | 11 (7.2)                       |
|                                                     | NSP6_ins70V, NSP6_C68S, NSP6_L67I                                                                                                                                                                                                                                                                                                                                                   | 8 (5.3) each                   |
|                                                     | NSP1_R24C, NSP1_E57K, NSP12_N491K, NSP13_M274I, NSP15_R206S, NSP2_S430L                                                                                                                                                                                                                                                                                                             | 6 (3.9) each                   |
|                                                     | NSP3_K837N, NSP3_M494I, NSP6_F66C, NSP8_T93I                                                                                                                                                                                                                                                                                                                                        | 5 (3.3) each                   |
|                                                     | NSP1_E57K, NSP3_L1359A, NSP3_C1362V, NSP3_L1358I, NSP3_L1357F, NSP3_L1361I, NSP3_Q1360T, NSP3_T1363Y, NSP3_T1356Y, NSP6_K61C, NSP6_M57N, NSP6_H64stop, NSP6_N40K, NSP6_Y38F, NSP6_P44T, NSP6_S53V, NSP6_M47Y, NSP6_I49Y, NSP6_M52Y, NSP6_F42L, NSP6_A41C, NSP6_A51C, NSP6_I50Y, NSP6_F66C, NSP6_H62Q, NSP6_F36V, NSP6_K63T, NSP6_A46C, NSP6_A56C, NSP6_M58D, NSP6_A54C, NSP6_F59del | 4 (2.6) each                   |
|                                                     | S                                                                                                                                                                                                                                                                                                                                                                                   | Spike_D614G                    |
| Spike_N501Y                                         |                                                                                                                                                                                                                                                                                                                                                                                     | 43 (28.3)                      |
| Spike_A701V                                         |                                                                                                                                                                                                                                                                                                                                                                                     | 41 (27)                        |
| Spike_K417N, Spike_D215G, Spike_D80A                |                                                                                                                                                                                                                                                                                                                                                                                     | 37 (24.3) each                 |
| Spike_A243del, Spike_L244del, Spike_L242del         |                                                                                                                                                                                                                                                                                                                                                                                     | 35 (23) each                   |
| Spike_L18F                                          |                                                                                                                                                                                                                                                                                                                                                                                     | 34 (22.4)                      |
| Spike_D614G                                         |                                                                                                                                                                                                                                                                                                                                                                                     | 26 (17.1)                      |
| Spike_E484K                                         |                                                                                                                                                                                                                                                                                                                                                                                     | 22 (14.5)                      |
| Spike_P681R                                         |                                                                                                                                                                                                                                                                                                                                                                                     | 18 (11.8)                      |
| Spike_T716I, Spike_A570D, Spike_D1118H, Spike_S982A |                                                                                                                                                                                                                                                                                                                                                                                     | 14 (9.2) each                  |
| Spike_P681H, Spike_A67V                             |                                                                                                                                                                                                                                                                                                                                                                                     | 13 (8.6) each                  |

|              |                                                                                                                                                            |               |
|--------------|------------------------------------------------------------------------------------------------------------------------------------------------------------|---------------|
|              | Spike_H69del, Spike_V70del                                                                                                                                 | 10 (6.6) each |
|              | Spike_V445A                                                                                                                                                | 8 (5.3)       |
|              | Spike_Y144F, Spike_V143del                                                                                                                                 | 7 (4.6) each  |
|              | Spike_Q134N, Spike_C136V, Spike_N137M, Spike_V126L, Spike_E132N, Spike_I128L, Spike_D138I, Spike_V127L, Spike_P139H, Spike_L141W, Spike_V130S, Spike_C131V | 6 (3.9) each  |
|              | Spike_Y144del                                                                                                                                              | 5 (3.3)       |
|              | Spike_Q677H, Spike_F157L                                                                                                                                   | 4 (2.6) each  |
| <b>ORF3a</b> | ORF3a_Q57H                                                                                                                                                 | 44 (28.9)     |
|              | ORF3a_S171L                                                                                                                                                | 43 (28.3)     |
|              | ORF3a_Q38E                                                                                                                                                 | 5 (3.3)       |
|              | ORF3a_S171L                                                                                                                                                | 4 (2.6)       |
| <b>E</b>     | E_P71L                                                                                                                                                     | 41 (26.9)     |
| <b>M</b>     | M_K15N                                                                                                                                                     | 8 (5.3)       |
|              | M_A2V                                                                                                                                                      | 5 (3.3)       |
| <b>ORF8</b>  | ORF8_Q27stop, ORF8_R52I                                                                                                                                    | 14 (9.2) each |
| <b>ORF9</b>  | ORF9_Y73C                                                                                                                                                  | 14 (9.2)      |
| <b>N</b>     | N_R203K, N_G204R                                                                                                                                           | 73 (48) each  |
|              | N_T205I                                                                                                                                                    | 42 (27.6)     |
|              | N_D3L, N_S235F                                                                                                                                             | 14 (9.2) each |
|              | N_S194L                                                                                                                                                    | 7 (4.6)       |
| <b>ORF10</b> | ORF10_K68stop                                                                                                                                              | 10 (6.6)      |
| <b>ORF11</b> | ORF11_I121L                                                                                                                                                | 9 (5.9)       |
| <b>ORF12</b> | ORF12_D35Y                                                                                                                                                 | 9 (5.9)       |
| <b>ORF13</b> | ORF13_P36T                                                                                                                                                 | 5 (3.3)       |

**Supplemental Table 4: 85 SARS-CoV-2 samples sequenced (Nov 2020 – Apr 2021) and metadata of sample date, Ct value, Division, District, Sex, Age, and Pangolin lineage. NA = Not Available**

| Strain name   | GISAID Accession | Sample Date  | Ct Value | Division   | District   | Sex    | Age (Year) | Lineage  |
|---------------|------------------|--------------|----------|------------|------------|--------|------------|----------|
| ideSHi-054    | EPI_ISL_1498134  | Dec 20, 2020 | 22.74    | Sirajganj  | Sirajganj  | Male   | 29         | B.1.1.25 |
| ideSHi-043    | EPI_ISL_1498152  | Dec 21, 2020 | 24.62    | Cumilla    | Cumilla    | Male   | 42         | B.1.1.25 |
| ideSHi-046    | EPI_ISL_1498146  | Dec 22, 2020 | 14.85    | Barishal   | Barishal   | Female | 50         | B.1.1.25 |
| ideSHi-045    | EPI_ISL_1498142  | Dec 31, 2020 | 22.58    | Sylhet     | Sylhet     | Male   | 22         | B.1.1.7  |
| ideSHi-042    | EPI_ISL_1599181  | Dec 26, 2020 | 18.93    | Chattogram | Chattogram | Male   | 19         | B.1.1.25 |
| ideSHi-041    | EPI_ISL_1498147  | Dec 21, 2020 | 18.75    | Rangpur    | Rangpur    | Male   | 22         | B.1.1.25 |
| ideSHi-044    | EPI_ISL_1599182  | Dec 31, 2020 | 19.31    | Sylhet     | Sylhet     | Male   | 33         | B.1.1.25 |
| ideSHi-047    | EPI_ISL_1498133  | Dec 22, 2020 | 21.19    | Barishal   | Barishal   | Female | 70         | B.1.1.25 |
| ideSHi-055    | EPI_ISL_1498148  | Dec 27, 2020 | 17.52    | Khulna     | Khulna     | Male   | 90         | B.1.1.25 |
| ideSHi-048    | EPI_ISL_1599183  | Dec 22, 2020 | 18.39    | Barishal   | Barishal   | Male   | 32         | B.1.1.25 |
| ideSHi-052    | EPI_ISL_1599184  | Dec 23, 2020 | 19.12    | Sirajganj  | Rajshahi   | Male   | 27         | B.1.1.25 |
| ideSHi-049    | EPI_ISL_1498130  | Dec 30, 2020 | 15.8     | Sirajganj  | Mymensingh | Female | 63         | B.1.1.25 |
| ideSHi-057    | EPI_ISL_1498129  | Dec 27, 2020 | 21.85    | Khulna     | Khulna     | Male   | 65         | B.1.1.25 |
| ideSHi-058    | EPI_ISL_1498144  | Dec 27, 2020 | 14.67    | Khulna     | Khulna     | Male   | 68         | B.1.1.25 |
| ideSHi-059    | EPI_ISL_1599185  | Dec 25, 2020 | 12.51    | NA         | NA         | Male   | 48         | B.1.1.25 |
| ideSHi-063    | EPI_ISL_1599186  | Jan 5, 2021  | 11.12    | NA         | Rajshahi   | Female | 43         | B.1.1.25 |
| ideSHi-034    | EPI_ISL_1599187  | Dec 10, 2020 | 23.99    | Dhaka      | Dhaka      | Female | 29         | B.1.1.25 |
| ideSHi-026    | EPI_ISL_1498143  | Jan 7, 2021  | 21.92    | Dhaka      | Dhaka      | Male   | 32         | B.1.1.25 |
| ideSHi-025    | EPI_ISL_1498135  | Jan 18, 2021 | 24.6     | Dhaka      | Dhaka      | Male   | 18         | B.1.1.25 |
| ideSHi-017    | EPI_ISL_1498128  | Dec 26, 2020 | 24.51    | Dhaka      | Dhaka      | Male   | 28         | B.1.1.25 |
| ideSHi-057    | EPI_ISL_1498126  | Mar 15, 2021 | 20.17    | NA         | NA         | Male   | 65         | B.1.351  |
| ideSHi-0210   | EPI_ISL_1498137  | Mar 15, 2021 | 18.34    | NA         | Dhaka      | Male   | 57         | B.1.351  |
| ideSHi-0216   | EPI_ISL_1498131  | Mar 15, 2021 | 24.41    | Dhaka      | Dhaka      | Male   | 55         | B.1.1.25 |
| ideSHi-078    | EPI_ISL_1498136  | Mar 16, 2021 | 20.5     | Dhaka      | Dhaka      | Male   | 37         | B.1.351  |
| ideSHi-T-1784 | EPI_ISL_1498145  | Mar 11, 2021 | 20.07    | Sunamganj  | Sylhet     | Male   | 24         | B.1.525  |
| ideSHi-N-1390 | EPI_ISL_1498127  | Mar 14, 2021 | 17.14    | Dhaka      | Dhaka      | Male   | 61         | B.1.351  |
| ideSHi-N-1392 | EPI_ISL_1498132  | Mar 16, 2021 | 18.92    | Dhaka      | Dhaka      | Male   | 59         | B.1.1.7  |
| ideSHi-N-1406 | EPI_ISL_1498138  | Mar 18, 2021 | 16.64    | Dhaka      | Dhaka      | Male   | 51         | B.1.351  |
| ideSHi-N-1465 | EPI_ISL_1498151  | Mar 28, 2021 | 19.69    | Dhaka      | Dhaka      | Female | 26         | B.1.351  |
| ideSHi-T-3089 | EPI_ISL_1498150  | Mar 28, 2021 | 20.02    | Mymensingh | Mymensingh | Male   | 50         | B.1.351  |
| ideSHi-N-1444 | EPI_ISL_1498139  | Mar 28, 2021 | 18.22    | Dhaka      | Dhaka      | Male   | 74         | B.1.351  |
| ideSHi-N-1483 | EPI_ISL_1498140  | Mar 29, 2021 | 14.48    | Dhaka      | Dhaka      | Male   | 52         | B.1.351  |
| ideSHi-N-1506 | EPI_ISL_1498141  | Mar 31, 2021 | 17.52    | Dhaka      | Dhaka      | Male   | 29         | B.1.351  |
| ideSHi-N-1500 | EPI_ISL_1498149  | Mar 31, 2021 | 17.62    | Dhaka      | Dhaka      | Female | 32         | B.1.351  |



|                     |                 |              |       |          |            |        |    |           |
|---------------------|-----------------|--------------|-------|----------|------------|--------|----|-----------|
| ideSHi-B-100402007  | EPI_ISL_1582390 | Feb 4, 2021  | 19.16 | Dhaka    | Dhaka      | Male   | 33 | B.1.1.7   |
| ideSHi-B-301702002  | EPI_ISL_1582391 | Feb 16, 2021 | 12.13 | Dhaka    | Dhaka      | Male   | 55 | B.1.1.7   |
| ideSHi-IEDCR-233472 | EPI_ISL_1582392 | Feb 18, 2021 | 19.14 | Dhaka    | Dhaka      | Female | 23 | B.1.1.7   |
| ideSHi-IEDCR-233622 | EPI_ISL_1582393 | Feb 20, 2021 | 22.89 | Dhaka    | Dhaka      | Female | 53 | B.1.1.7   |
| ideSHi-B-302102001  | EPI_ISL_1582394 | Feb 21, 2021 | 17.82 | Dhaka    | Dhaka      | Male   | 55 | B.1.1.7   |
| ideSHi-B-302302003  | EPI_ISL_1582395 | Feb 23, 2021 | 23.62 | Dhaka    | Dhaka      | Male   | 22 | B.1.1.7   |
| ideSHi-B-302502004  | EPI_ISL_1582396 | Feb 25, 2021 | 18.24 | Dhaka    | Dhaka      | Male   | 24 | B.1.1.7   |
| ideSHi-B-302502005  | EPI_ISL_1582397 | Feb 25, 2021 | 25.46 | Dhaka    | Dhaka      | Female | 53 | B.1.1.7   |
| ideSHi-ESP001       | EPI_ISL_1575127 | Apr 7, 2021  | 14.6  | Dhaka    | Dhaka      | Male   | 65 | B.1.351   |
| ideSHi-ESP002       | EPI_ISL_1587429 | Mar 18, 2021 | 16.86 | Dhaka    | Dhaka      | Female | 56 | B.1.351   |
| ideSHi-ESP003       | EPI_ISL_1593853 | Mar 25, 2021 | 19    | Dhaka    | Dhaka      | Male   | 47 | B.1.1.7   |
| ideSHi-IR-09        | EPI_ISL_1587430 | Apr 1, 2021  | 23.49 | Dhaka    | Dhaka      | Female | 52 | B.1.351   |
| ideSHi-IR-33        | EPI_ISL_1587431 | Apr 3, 2021  | 19.62 | Dhaka    | Dhaka      | Male   | 50 | B.1.351   |
| ideSHi-IR-34        | EPI_ISL_1587432 | Apr 3, 2021  | 24.28 | Dhaka    | Dhaka      | Male   | 38 | B.1.351   |
| ideSHi-IR-71        | EPI_ISL_1587433 | Apr 4, 2021  | 20.44 | Dhaka    | Dhaka      | Male   | 34 | B.1.351   |
| ideSHi-TR-341       | EPI_ISL_1593854 | Apr 4, 2021  | 20.07 | Habiganj | Sylhet     | Male   | 36 | B.1.351   |
| ideSHi-IR-51        | EPI_ISL_1587434 | Apr 4, 2021  | 23.28 | Dhaka    | Dhaka      | Male   | 42 | B.1.351   |
| ideSHi-IR-87        | EPI_ISL_1587435 | Apr 5, 2021  | 23.76 | NA       | NA         | Female | 45 | B.1.351   |
| ideSHi-IR-73        | EPI_ISL_1587436 | Apr 5, 2021  | 21.81 | Dhaka    | Dhaka      | Male   | 38 | B.1.351   |
| ideSHi-IR-98        | EPI_ISL_1587437 | Apr 6, 2021  | 19.07 | Dhaka    | Dhaka      | Female | 71 | B.1.351   |
| ideSHi-IR-121       | EPI_ISL_1587438 | Apr 7, 2021  | 19.05 | Dhaka    | Dhaka      | Female | 43 | B.1.351   |
| ideSHi-IR-123       | EPI_ISL_1587439 | Apr 7, 2021  | 24.72 | Dhaka    | Dhaka      | Male   | 54 | B.1.351   |
| ideSHi-TR-1069      | EPI_ISL_1587440 | Apr 8, 2021  | 21.48 | Dhaka    | Dhaka      | Female | 51 | B.1.351   |
| ideSHi-IR-137       | EPI_ISL_1587441 | Apr 8, 2021  | 19.37 | Dhaka    | Dhaka      | Female | 51 | B.1.351   |
| ideSHi-IR-179       | EPI_ISL_1587442 | Apr 8, 2021  | 18.46 | Dhaka    | Dhaka      | Male   | 48 | B.1.351   |
| ideSHi-TR-1310      | EPI_ISL_1587443 | Apr 11, 2021 | 22.35 | Noakhali | Chattogram | Male   | 42 | B.1.351   |
| ideSHi-TR-1381      | EPI_ISL_1587444 | Apr 11, 2021 | 23    | Pirojpur | Barishal   | Male   | 28 | B.1.351   |
| ideSHi-IR-182       | EPI_ISL_1587445 | Apr 11, 2021 | 21.02 | Dhaka    | Dhaka      | Male   | 60 | B.1.351   |
| ideSHi-IR-197       | EPI_ISL_1593855 | Apr 11, 2021 | 25.8  | Dhaka    | Dhaka      | Male   | 61 | B.1.351   |
| ideSHi-IR-172       | EPI_ISL_1587446 | Apr 10, 2021 | 19.76 | Dhaka    | Dhaka      | Female | 40 | B.1.351   |
| ideSHi-IR-1214      | EPI_ISL_1587447 | Apr 10, 2021 | 20.7  | Dhaka    | Dhaka      | Male   | 29 | B.1.351   |
| ideSHi-KH007        | EPI_ISL_1657075 | Nov 12, 2020 | 25    | Dhaka    | Dhaka      | Male   | 30 | B.1.1.25  |
| ideSHi-CP022        | EPI_ISL_1657076 | Jan 6, 2021  | 21.89 | Dhaka    | Dhaka      | Female | 35 | B.1.1.25  |
| ideSHi-MH029        | EPI_ISL_1657077 | Jan 14, 2021 | 17.57 | Dhaka    | Dhaka      | Male   | 32 | B.1.1.25  |
| ideSHi-MH004        | EPI_ISL_1657078 | Nov 11, 2020 | 19.21 | Dhaka    | Dhaka      | Female | 37 | B.1.1.315 |
| ideSHi-CP012        | EPI_ISL_1657079 | Dec 6, 2020  | 22.04 | Dhaka    | Dhaka      | Male   | 29 | B.1.1.25  |
| ideSHi-MH003        | EPI_ISL_1657080 | Nov 11, 2020 | 24.42 | Dhaka    | Dhaka      | Female | 37 | B.1.1.25  |
| ideSHi-KH015        | EPI_ISL_1657081 | Nov 29, 2020 | 20.64 | Dhaka    | Dhaka      | Male   | 67 | B.1.1.25  |
| ideSHi-CP005        | EPI_ISL_1669902 | Nov 15, 2020 | 23.28 | Dhaka    | Dhaka      | Male   | 53 | B.1.1.25  |

|                  |                 |              |       |       |       |        |    |          |
|------------------|-----------------|--------------|-------|-------|-------|--------|----|----------|
| ideSHi-MH007-D01 | EPI_ISL_1657082 | Nov 15, 2020 | 23.32 | Dhaka | Dhaka | Male   | 45 | B.1.1.25 |
| ideSHi-CP030     | EPI_ISL_1669903 | Feb 7, 2021  | 22.75 | Dhaka | Dhaka | Female | 23 | B.1.1.25 |
| ideSHi-KH023     | EPI_ISL_1657083 | Dec 14, 2020 | 23.38 | Dhaka | Dhaka | Male   | 50 | B.1.1.25 |
| ideSHi-IR-204    | EPI_ISL_1669904 | Apr 12, 2021 | 23.98 | Dhaka | Dhaka | Female | 27 | B.1.1.7  |
| ideSHi-IR-205    | EPI_ISL_1669905 | Apr 12, 2021 | 23.52 | Dhaka | Dhaka | Male   | 31 | B.1.1.7  |
| ideSHi-IR-209    | EPI_ISL_1657084 | Apr 12, 2021 | 21.95 | Dhaka | Dhaka | Male   | 74 | B.1.351  |
| ideSHi-IR-211    | EPI_ISL_1669906 | Apr 13, 2021 | 24.11 | Dhaka | Dhaka | Male   | 33 | B.1.351  |
| ideSHi-IR-212    | EPI_ISL_1657085 | Apr 13, 2021 | 22.4  | Dhaka | Dhaka | Male   | 69 | B.1.351  |
| ideSHi-IR-238    | EPI_ISL_1657086 | Apr 14, 2021 | 22.62 | Dhaka | Dhaka | Female | 60 | B.1.351  |
| ideSHi-IR-255    | EPI_ISL_1669907 | Apr 15, 2021 | 22.39 | Dhaka | Dhaka | Female | 35 | B.1.351  |
| ideSHi-IR-256    | EPI_ISL_1657087 | Apr 15, 2021 | 21.48 | Dhaka | Dhaka | Female | 30 | B.1.351  |
| ideSHi-IR-244    | EPI_ISL_1657088 | Apr 15, 2021 | 24.23 | Dhaka | Dhaka | Male   | 46 | B.1.351  |

---

### **GISAID acknowledgements**

We gratefully acknowledge the Authors from the Originating laboratories responsible for obtaining the specimens, as well as the Submitting laboratories where the genome data were generated and shared via GISAID, on which this research is based. All acknowledgements for the global phylogeny produced by Rob Lanfear of all GISAID submissions up to 31/7/20 can be found at <https://github.com/roblanf/sarscov2phylo/tree/31-7-20/acknowledgements>

Bangladeshi strain GISAID acknowledgements can be found in additional file Bangladesh\_gisaid\_acknowledgement.pdf.
